# Supplementary material for: Processes Governing Alkaline Groundwater Chemistry within a Fractured Rock (Ophiolitic Mélange) Aquifer Underlying a Seasonally Inhabited Headwater Area in the Aladağlar Range (Adana, Turkey)
Source: Hindawi journal article supplement (doi:10.1155/2017/3153924), 2017-01-01
Supplement: f1 [file 3153924.f1.xls]

## Sheet: MetaData
Table A.1
Key for Column Headings:	Explanation:
Well_ID	Hand-dug well identification number
Date	Date sample was collected
X_WGS84	X coordinate, in meters (WGS84 datum and UTM zone 36N)
Y_WGS84	Y coordinate, in meters (WGS84 datum and UTM zone 36N)
pH	pH (Hydrogen-ion activity), in standard unit
Eh_mV	Redox potetial, in millivolts
DO _mgL	Dissolved oxygen concentration, in milligrams per liter
EC_mScm	Electrical conductivity, in microSiemens per centimeter
Temp_C	Water temperature, in degrees Celcius
Ca_ppm	Calcium concentration, in parts per million
Mg_ppm	Magnesium concentration, in parts per million
Na_ppm	Sodium concentration, in parts per million
K_ppm	Potassium concentration, in parts per million
NH4_ppm	Ammonium concentration, in parts per million
Cl_ppm	Chloride concentration, in parts per million
HCO3_ppm	Bicarbonate concentration, in parts per million
CO3_ppm	Carbonate concentration, in parts per million
SO4_ppm	Sulfate concentration, in parts per million
NO3_ppm	Nitrate concentration, in parts per million
NO2_ppm	Nitrite concentration, in parts per million
PO4_ppm	Orthophosphate concentration, in parts per million
F_ppm	Fluoride concentration, in parts per million
Si_ppm	Silicon concentration, in parts per million
Al_ppb	Aluminum concentration, in parts per billion
As_ppb	Arsenic concentration, in parts per billion
B_ppb	Boron concentration, in parts per billion
Ba_ppb	Barium concentration, in parts per billion
Br_ppb	Bromide concentration, in parts per billion
Co_ppb	Cobalt concentration, in parts per billion
Cr_ppb	Chromium concentration, in parts per billion
Cu_ppb	Copper concentration, in parts per billion
Fe_ppb	Iron concentration, in parts per billion
Li_ppb	Lithium concentration, in parts per billion
Mn_ppb	Manganese concentration, in parts per billion
Mo_ppb	Molybdenum concentration, in parts per billion
Ni_ppb	Nickel concentration, in parts per billion
Sr_ppb	Strontium concentration, in parts per billion
Ti_ppb	Titanium concentration, in parts per billion
V_ppb	Vanadium concentration, in parts per billion
Zn_ppb	Zinc concentration, in parts per billion
TDS_Cal	Total dissolved solids concentration (calculated as sum of all ions), in parts per million
WTopo_m	Topographic height at well location, in meters above mean sea level
WDepth_m	Total well depth, in meters
DTW_m	Depth to water below ground surface, in meters
Key for Datasets:	Explanation:
GW Chemistry (Dry Season)	Dry season (October 2011) groundwater chemistry data for the Kızılgedik site (Adana, Turkey)
GW Chemistry (Wet Season)	Wet season (May 2012) groundwater chemistry data for the Kızılgedik site (Adana, Turkey)

## Sheet: GW Chemistry (Dry Season)
Well_ID	Date	X_WGS84	Y_WGS84	pH	Eh_mV	DO _mgL	EC_mScm	Temp_C	Ca_ppm	Mg_ppm	Na_ppm	K_ppm	NH4_ppm	Cl_ppm	HCO3_ppm	CO3_ppm	SO4_ppm	NO3_ppm	NO2_ppm	PO4_ppm	F_ppm	Si_ppm	Al_ppb	As_ppb	B_ppb	Ba_ppb	Br_ppb	Co_ppb	Cr_ppb	Cu_ppb	Fe_ppb	Li_ppb	Mn_ppb	Mo_ppb	Ni_ppb	Sr_ppb	Ti_ppb	V_ppb	Zn_ppb	TDS_Cal	WTopo_m	WDepth_m	DTW_m
W1	2011-09-30	714334	4157341	8.38	-83	2.71	621	16.9	4.73815	69.7909	17.8981	3.9936	4.1546	3.3	292.384	7.35088	5	9.8	0.68	0	0.03	2.715	7.144	0.9093	53.26	0.4425	32.8	0.5857	1.44	0.1158	18.06	5.6	7.464	0.8389	2.466	6.93	14.32	0.3902	8.82	422.027	1127.52	7.265	4.97
W2	2011-09-30	714261	4157304	8.76	-103	5.85	352	14.6	8.86205	43.3826	4.5237	0.6069	0	1.2	175.39	9.43554	3	4.1	0.007	0	0.01	4.183	4.215	0.9046	58.03	1.479	26.825	0	0	0.754	0	5.4	0.2006	0.7927	1.857	11.86	25.67	0.4688	16.26	254.876	1136.79	9.455	6.91
W3	2011-09-30	714230	4157250	8.01	-62	3.37	581	18.1	29.1643	63.6206	2.4023	0.1605	0	0.8	320.406	3.54083	2	1.2	0.009	0	0.01	8.689	3.112	0.8732	43.12	3.066	25.175	0	1.793	0.7318	2.741	6.1	2.977	0.7663	4.032	43.32	80.04	0.3599	8.678	432.25	1131.31	4.945	4.3
W4	2011-09-30	714124	4157082	8.69	-100	3.87	323	15.3	6.0761	40.5023	1.8022	1.38445	0.3165	2	157.226	7.2508	1	3.3	0.06	0	0.01	4.153	57.68	0.9566	52.04	2.012	37.78	0.6551	0.2426	1.454	176.8	5.2	18.08	0.7337	7.364	13.22	18.27	0.6504	12.27	225.516	1129.98	8.09	6.48
W5	2011-09-30	714069	4157091	9.15	-126	3.15	439	15.7	4.04965	61.5386	1.7933	1.03435	0	0.6	181.245	25.1901	11	5.5	0.098	0	0.01	2.166	23.69	0.9013	37.59	1.168	24.16	0.5126	0.4652	1.31	112	5.3	9.742	0.6971	7.263	10.91	12.86	0.4568	15.79	294.53	1135.63	7.38	5.9
W6	2011-09-30	714091	4156935	9.44	-141	5.46	301	12.6	16.9687	33.1085	1.9643	1.08565	0.2875	1.8	113.09	27.1317	10	2	0.082	0	0	1.798	221.8	1.707	43.14	1.591	34.12	3.932	7.688	1.12	1018	5.1	34.53	0.8103	36.06	44.66	51.09	3.689	8.839	210.935	1154.18	9.54	9.21
W7	2011-09-30	714167	4157016	7.96	-59	5.14	410	16.1	24.4017	39.8786	1.64825	0.2259	0	0.3	217.774	11.289	0	1.6	0.0105	0	0.25	8.048	10.45	0.9068	27.56	2.103	21.11	0	7.495	1.482	41.87	5.7	3.136	0.7173	3.859	87.59	70.2	0.3875	41.4	305.782	1127.9	7.47	5.45
W8	2011-09-30	714196	4157039	9.31	-134	5.1	395	14.9	3.56125	55.9751	1.6191	0.26995	0	0.2	168.935	32.7962	1	1.4	0.01	0	0.03	1.393	6.157	0.8673	31.85	0.3842	22.965	0	4.624	0.3136	11.69	5.4	1.032	0.6821	1.544	7.75	12.07	0.3412	7.279	267.325	1123.26	6.64	4.65
W9	2011-09-30	714202	4157155	8.11	-68	4.92	412	20.2	20.0119	43.2582	2.53715	0.3895	0	0.6	206.565	2.89231	0	4	0.0075	0	0.23	10.92	10.38	0.8818	33.13	1.366	24.19	0	1.833	0.4285	19.58	6.2	1.026	0.6809	2.833	74.41	54.68	0.3681	6.55	291.67	1122.12	3.29	2.46
W10	2011-09-30	714123	4157145	8.41	-84	5.08	425	17.1	18.3581	44.3004	2.22295	0.57835	0.0348	1	195.556	5.07406	4	6.2	0.0135	0.089	0.05	10.08	31.8	0.9606	30.94	1.304	22.855	0.191	1.781	0.2734	110.1	6.1	5.764	0.7268	7.382	46.59	50.61	0.6638	12.67	287.898	1130.02	6.36	4.39
W11	2011-10-01	714315	4157205	9.08	-121	5.24	362	15.6	4.58185	46.4376	3.0552	1.0487	0.1512	3.4	152.422	17.544	1	5.1	0.0105	0	0.01	3.154	8.261	0.8807	20.34	0.5106	25.055	0	1.203	0	67.11	4.9	2.477	0.6565	4.141	8.913	13.42	0.3995	8.727	238.102	1119.96	6.78	4.42
W12	2011-10-01	714307	4157186	8.97	-115	4.37	395	14.3	4.3339	50.6025	3.22925	1.1477	0.0173	4.6	166.283	14.4816	1	6.5	0.046	0	0.05	1.678	9.117	0.882	25.8	0.8442	27.095	0	0	0.2928	20.6	5.1	2.046	0.668	2.28	6.153	12.68	0.3456	9.454	254.213	1117.84	8.68	6.12
W13	2011-10-01	714312	4157169	9.31	-133	5.56	379	14.1	2.92235	49.868	3.24005	1.1632	0	5.2	142.664	26.8915	1	5.2	0.004	0.099	0.04	1.58	4.222	0.8632	22.8	0.6639	25.535	0	0	0.9682	7.316	5.1	0.5808	0.6529	1.905	3.318	9.954	0.278	10.05	240.046	1115.87	6.95	5.84
W14	2011-10-01	714330	4157126	8.24	-75	5.51	434	16.1	23.4759	39.2681	4.37265	0.897	0	5.4	192.354	3.28663	0	7.9	0.007	0	0.023	10.64	8.423	0.9132	14.81	2.227	25.985	0	4.856	0.4304	13.61	5.5	1.338	0.7359	4.354	48.3	64.69	0.573	19.12	287.86	1112.98	7.05	5.22
W15	2011-10-01	714312	4157099	8.12	-68	4.8	422	16.7	21.8794	43.0009	2.5872	0.49145	0	4	224.379	2.96337	0	1.9	0.038	0	0.07	8.334	14.57	0.9415	21.65	1.369	25.46	0	2.312	0.8123	29.55	5.5	1.285	0.6666	3.599	60.07	60.23	0.9227	7.719	309.92	1112.19	4.67	2.5
W16	2011-10-01	714244	4157065	9.15	-125	5.5	402	16	10.423	48.9843	1.81365	0.4019	0.0679	1.8	175.69	24.2194	1	1.4	0.01	0	0.09	3.582	3.598	0.8746	27.69	0.5021	20.9	0	8.16	0	8.109	5.6	0.4839	0.7057	2.517	26.44	29.73	0.3078	7.178	269.645	1116.13	7.4	4.71
W17	2011-10-01	714276	4157071	8.75	-102	5.58	391	14.7	13.6181	42.0672	1.7839	0.4064	0	1.7	181.795	9.58466	1	1.8	0.008	0.085	0.01	4.307	15.87	0.9322	36.04	1.238	20.315	0	3.651	0.5539	33.42	5.3	2.595	0.6826	3.003	35.94	41.99	0.9185	12.62	258.431	1115.03	6.5	5.7
W18	2011-10-01	714286	4157251	9.15	-125	4	364	14.2	2.38575	48.3029	2.28865	1.41165	0	4	154.073	20.1061	0	5	0.041	0.121	0.014	0.579	24.65	0.8753	33.83	0.9114	23.835	0.3044	0.1745	0.9262	205.6	5.1	8.453	0.6391	8.578	4.793	8.036	0.5524	18.17	238.709	1127.88	7.32	7.04
W19	2011-10-01	714250	4157245	8.32	-79	5	553	16.2	32.1283	56.3967	2.3831	0.32315	0.512	2.7	295.987	6.31505	0	1	0.012	0	0.8	8.447	4.095	0.8888	35.86	3.124	25.405	0	5.291	0	4.256	6.8	1.46	0.7062	2.846	44.84	83.14	0.3603	15.06	407.248	1128.75	6.87	5.92
W20	2011-10-01	714407	4157310	9.24	-132	3.77	378	18.2	2.447	50.5182	2.74455	0.8128	0	2.5	152.172	27.0816	0	2.8	0.003	0	0.08	1.248	10.42	0.8683	29.41	1.098	24.45	0	0.3574	0	78.85	5.1	2.753	1.276	1.676	4.688	8.634	0.4136	10.5	242.617	1117.01	4.345	3.61
W21	2011-10-01	714417	4157298	8.98	-116	2.07	384	16	4.9641	51.0583	1.9483	1.26205	0	1.5	188.651	17.574	0	0.7	0.014	0	0.02	1.889	40.1	1.114	13.66	5.808	31.165	0.4128	0	0.2265	100.7	5.1	78.61	0.9415	4.032	24.43	17.44	1.013	11.07	269.916	1118.08	5.55	4.5
W22	2011-10-01	714395	4157278	9.35	-138	6.23	343	18.9	3.6498	44.1089	1.98625	0.9996	0.0438	2.4	120.146	27.6621	0	4.2	0.013	0	0.06	1.764	15.13	0.9409	14.05	1.573	33.475	0.3327	0	0.08651	76.45	5	4.629	0.8764	6.646	11.23	10.57	0.5305	5.416	207.24	1119.93	6.24	2.4
W23	2011-10-01	714514	4157413	8.52	-91	3.92	395	18.5	8.84985	48.6821	2.15485	0.23695	0	2.8	207.566	7.15872	0	2.2	0.009	0	0.01	5.146	3.508	0.8728	16.28	1.575	26.73	0	4.682	0	24.5	5	1.22	0.7377	2.011	11.82	25.61	0.3834	7.035	284.985	1104.1	4.77	2.92
W24	2011-10-01	714513	4157444	8.33	-80	4.87	471	19	12.5338	54.5131	3.3493	0.66175	0.0445	3.8	219.876	5.02802	0	5.6	0.03	0.091	0.02	8.803	4.406	0.9083	15.93	0.4829	28.855	0	11.32	0	10.75	5.3	1.834	0.7232	2.629	27.83	34.32	0.569	9.814	314.556	1104.2	4.92	3.2
W25	2011-10-01	714453	4157426	8.66	-98	4.84	541	16.2	9.0769	69.2406	2.7679	0.72665	1.1059	3.5	280.374	13.0604	0	2	0.013	0	0.02	6.013	4.218	0.875	22.59	0.6442	28.15	0.1594	1.437	0	28.94	5.8	25.67	0.6958	6.623	11.96	25.63	0.4186	4.558	388.077	1110.98	4.99	1.81

## Sheet: GW Chemistry (Wet Season)
Well_ID	Date	X_WGS84	Y_WGS84	pH	Eh_mV	DO _mgL	EC_mScm	Temp_C	Ca_ppm	Mg_ppm	Na_ppm	K_ppm	NH4_ppm	Cl_ppm	HCO3_ppm	CO3_ppm	SO4_ppm	NO3_ppm	NO2_ppm	PO4_ppm	F_ppm	Si_ppm	Al_ppb	As_ppb	B_ppb	Ba_ppb	Br_ppb	Co_ppb	Cr_ppb	Cu_ppb	Fe_ppb	Li_ppb	Mn_ppb	Mo_ppb	Ni_ppb	Sr_ppb	Ti_ppb	V_ppb	Zn_ppb	TDS_Cal	WTopo_m	WDepth_m	DTW_m
W1	26/05/2012	714334	4157341	7.37	-35	4.84	455	14.3	14.305	38.295	4.3065	0.5746	0	6.7	175.44	0.380804	0	5	0.179	0	0.01	3.978	14.11	0.0882	22.29	0.3569	34.82	0	2.214	0.3114	32.49	1.197	0.8284	0.1004	5.727	11.66	16.67	0.3082	6.298	249.349	1127.52	7.265	2.34
W2	26/05/2012	714261	4157304	8.48	-98	6.37	327	13.7	13.005	25.845	3.20007	0.2626	0	3.2	116.994	3.11749	1	5.1	0.004	0	0	2.276	4.114	0.1196	26.1	0.49535	29.35	0	1.547	0.1768	1.849	0.9518	0.01968	0.07189	1.5185	9.079	19.81	0.3542	0.8748	174.12	1136.79	9.455	6.17
W3	26/05/2012	714230	4157250	7.77	-57	5.19	523	16.6	43.67	33.36	1.49563	0.06949	0	2.5	234.337	1.38711	3	1.2	0.004	0	0.02	4.3125	3.43	0.1489	15.05	1.8415	27.72	0	1.986	0.5883	0	1.607	0	0.0833	5.1465	29.27	40.51	0.2398	1.715	325.525	1131.31	4.945	2.79
W4	26/05/2012	714124	4157082	8.6	-105	8.98	274	15.2	22.805	15.86	1.0354	0.3646	0.0184	3.7377	96.377	3.47578	1	4.6	0.015	0	0.13	3.7935	7.222	0.2342	9.766	0.925	29.68	0	2.657	0.2914	24.66	0.8885	1.681	0.0006261	3.852	36.26	23.86	0.2512	0.617	153.375	1129.98	8.09	1.17
W5	26/05/2012	714069	4157091	8.2	-81	5.4	376	12.2	20.095	26.33	1.42957	0.4463	0	3.5	123.048	1.66933	7	6.2	0.013	0	0.06	3.8295	8.968	0.3251	9.098	0.6913	30.13	0	2.357	0.985	18.44	1.158	0.7515	0.005353	5.892	45.72	21.93	0.2907	98.595	193.926	1135.63	7.38	4.27
W6	26/05/2012	714091	4156935	8.43	-94	5.76	376	13	33.765	22.035	1.77053	0.133467	0.0134	2.8	158.877	3.77302	3	1.2	0.005	0	0.15	3.065	23.94	0.4615	18.22	1.433	28.73	0.3564	5.021	0.6803	75.37	1.966	4.858	0.1058	8.234	86.85	38.57	0.518	1.269	230.904	1154.18	9.54	5
W7	26/05/2012	714167	4157016	7.76	-56	6.38	377	12.7	37.475	18.53	1.098	0.15955	0	2	163.13	0.819155	0	1.2	0.009	0	0.07	3.452	5.566	0.1317	9.595	1.036	27.27	0	3.832	1.136	4.302	1.181	0.08666	0.01515	3.939	61.8	40.64	0.2069	29.86	228.154	1127.9	7.47	2.5
W8	26/05/2012	714196	4157039	8.31	-88	6.1	347	13.6	30.565	19.26	1.75703	0.26765	0.004	2.2	141.163	2.55604	0	2.5	0.012	0	0.07	2.4495	4.478	0.1789	9.72	1.5635	25.97	0	5.884	0.7368	2.986	1.118	0.07016	0.02491	2.373	45.44	37.87	0.3474	4.424	202.987	1123.26	6.64	1.52
W9	26/05/2012	714202	4157155	7.74	-56	3.46	369	15.1	18	27.505	1.79627	0.1415	0	3.1	144.666	0.735488	0	2.9	0.006	0	0.06	3.648	4.128	0.3177	16.15	0.2862	28.69	0	1.792	0.2801	7.362	1.379	0.005572	0.166	3.6415	33.5	18.65	0.2578	0.2674	202.695	1122.12	3.29	1.55
W10	26/05/2012	714123	4157145	7.93	-67	5.85	348	13.6	21.79	21.93	1.83683	0.2104	0	3.8	113.791	0.854583	4	6.1	0.009	0	0.09	4.837	24.59	0.7805	11.76	0.3808	32.76	0	1.95	0.6244	55.37	1.64	0.6317	0.07339	10.0145	30.26	19.27	0.3635	5.305	179.505	1130.02	6.36	3.12
W11	26/05/2012	714315	4157205	8.43	-95	4.4	302	12.5	6.1995	25.84	2.00767	0.3796	0	4.2	98.1785	2.22978	1	5.2	0.005	0	0.03	2.5705	3.733	0.6502	6.463	0.2573	29.31	0	3.415	0.2311	6.097	0.5346	0.0802	0	3.123	7.484	7.877	0.5577	4.4025	147.945	1119.96	6.78	3.21
W12	26/05/2012	714307	4157186	8.56	-102	4.72	356	12.6	8.8455	27.43	2.8257	0.5722	0	5.2	109.788	3.40372	3	4.2	0.013	0	0.06	2.126	4.997	0.6857	12.85	0.7881	30.87	0	3.348	0.2924	0	0.8103	0.05773	0	1.6115	12.35	18.55	0.6779	7.3175	167.599	1117.84	8.68	5.06
W13	26/05/2012	714312	4157169	8.31	-87	5.09	369	12.3	17.675	26.74	2.73023	0.4392	0	6.1	132.006	2.30885	0	4.3	0.008	0	0.04	3.1605	2.959	0.7437	8.787	0.7952	31.86	0	3.593	0.2393	0	0.6906	0	0	1.9655	14.17	18.76	0.5362	5.091	195.637	1115.87	6.95	4.2
W14	26/05/2012	714330	4157126	8.05	-73	5.4	403	13.3	21.69	24.735	2.92553	0.1853	0	5.7	123.949	1.22598	0	7.2	0.01	0	0.07	3.978	9.403	0.6264	4.802	0.84335	31.7	0	2.758	0.5076	4.462	0.7918	0.2387	0	1.96	19.17	14.59	0.5221	13.1	191.794	1112.98	7.05	3.49
W15	26/05/2012	714312	4157099	7.88	-64	4.56	406	14.8	22.945	27.865	1.62423	0.1767	0	3.7	155.674	1.09187	0	2.8	0.005	0	0.08	2.77	3.019	0.8872	12.78	0.844	32.25	0	2.513	0.4827	0	1.14	0	0	2.5415	31.83	25.52	0.7562	0.72865	218.858	1112.19	4.67	1.09
W16	26/05/2012	714244	4157065	8.1	-76	5.74	363	14.3	34.48	18.26	1.6327	0.6204	0	2.1	147.618	1.68635	0	2.8	0.1	0.0616	0.07	2.726	5.773	0.6826	13.21	1.871	28.25	0	3.907	0.594	2.449	1.152	0	0.02801	4.196	48.77	38.11	0.4664	10.625	212.335	1116.13	7.4	1.06
W17	26/05/2012	714276	4157071	8.06	-73	5.46	400	11	31.405	24.025	1.87393	0.291	0	2.8	165.332	1.58727	0	2.6	0.009	11.9938	0.06	3.3985	28.84	0.5317	15.47	1.093	29.01	0	3.447	0.4891	41.43	1.125	1.005	0	4.261	37.36	29.95	0.429	10.4265	245.631	1115.03	6.5	3.98
W18	26/05/2012	714286	4157251	9.32	-145	3.75	374	13	2.2495	38.175	3.43567	1.1984	0	7	106.986	19.5656	0	5.3	0.05	0	0.02	0.2832	13.17	0.2198	30.96	0.1975	36.27	0	3.01	0.1357	21.28	0.6699	1.453	0	1.934	2.119	6.191	0.9971	5.0845	184.427	1127.88	7.32	5.45
W19	26/05/2012	714250	4157245	7.82	-60	6.04	556	13	47.73	32.4	1.69023	0.0957	0	2.9	244.045	1.47718	0	0.9	0.006	0	0.09	4.6075	3.96	0.2563	15.59	3.414	31.81	0	4.123	0.4185	0	2.184	0	0.0307	4.089	33.99	40.29	0.2568	8.462	336.141	1128.75	6.87	4.98
W20	27/05/2012	714407	4157310	8.06	-74	4.85	317	14.6	8.1465	27.89	2.22303	0.2232	0	3.6	122.348	1.26501	0	2.4	0.006	0	0.02	2.6625	3.749	0.2783	12.62	0.2932	30.84	0	3.693	0.2947	1.992	0.7002	0	0	3.1085	12.26	10.22	0.4479	17.2	170.892	1117.01	4.345	1.42
W21	27/05/2012	714417	4157298	8.49	-99	6.14	256	13.9	5.4245	23.92	1.12033	0.3194	0.1112	2.5	94.7257	2.54403	0	3.1	0.007	0	0.04	2.479	7.426	0.4944	5.077	1.397	32.18	0	6.836	0.1325	2.216	0.514	0.1655	0	1.305	14.29	6.887	0.6676	28.82	136.45	1118.08	5.55	1.2
W22	27/05/2012	714395	4157278	8.21	-83	5.95	316	15.1	7.2955	27.42	1.1695	0.3146	0	2.5	109.888	1.6203	0	4.5	0.008	0	0.01	2.049	4.033	0.4871	6.647	1.116	37.85	0	2.915	0.008614	3.745	0.5518	0	0	5.425	14.57	10.2	0.7093	0.88975	156.884	1119.93	6.24	1
W23	27/05/2012	714514	4157413	8.06	-74	3.22	385	14.1	12.29	33.255	1.3719	0.127	0	2.9	158.727	1.65032	0	1.5	0.011	0	0.02	2.1325	5.894	0.4749	9.23	1.951	31.76	0	5.239	0.2282	6.374	0.5969	0.2368	0	3.635	10.58	16.21	0.6737	3.287	214.111	1104.1	4.77	1.19
W24	27/05/2012	714513	4157444	8.18	-81	5.98	330	14.9	8.7965	28.015	1.5874	0.1952	0	4.5	112.79	1.55124	0	5.1	0.005	0	0.02	3.333	5.567	0.786	6.916	0.1178	31.99	0	6.467	0.06913	12.17	0.7517	0.1139	0	3.831	11.83	9.542	0.8012	32.465	166.047	1104.2	4.92	1.45
W25	27/05/2012	714453	4157426	8.03	-73	5.04	508	14.3	14.13	46.64	1.73983	0.09833	0.0173	3.6	219.626	2.20877	0	0.7	0.008	0	0	3.2075	2.457	0.8571	16.96	0.327	33.45	0	3.111	0.1502	0	1.401	0.7783	0	3.392	13.74	14.36	0.6963	1.0238	292.078	1110.98	4.99	0.42
